# Supplementary material for: Targeting activated PI3K/mTOR signaling overcomes acquired resistance to CDK4/6-based therapies in preclinical models of hormone receptor-positive breast cancer
Source: Breast Cancer Res. 2020 Aug 14;22:89. doi: 10.1186/s13058-020-01320-8 (PMC7427086; doi:10.1186/s13058-020-01320-8)
Supplement: Supplementary file 4 — Additional file 4: Table S1. Table listing Ribociclib IC50 in each of the breast cancer cell lines. ER, AR and HER2 levels, as measured by RPPA, also included for reference. [file 13058_2020_1320_MOESM4_ESM.xlsx]

## Sheet: Sheet1
CellLineName	Subtype	IC50 μM	ER	HER2	AR
HCC2218	HER2+/ER-	0.029807	-1.26	4.96	0.77
MDA-MB-175-VII	HER2-/ER+	0.0317139	0	2.46	0.39
MDA-MB-134-VI	HER2-/ER+	0.0354837	3.06	1.41	0.99
UACC-893	HER2+/ER-	0.074094	-1.11	4.32	0.42
EFM-19	HER2-/ER+	0.0818397	2.5	2.59	0.73
CAMA-1	HER2+/ER-	0.0838482	-0.46	3.4	1.23
ZR-75-1	HER2-/ER+	0.0923023	2.13	1.58	0.52
MDA-MB-415	HER2-/ER+	0.103524	0.2	2.08	0.68
HCC202	HER2+/ER-	0.165239	-1.38	4.69	1.67
HCC1419	HER2+/ER+	0.176269	0.09	4.67	0.47
BT-474	HER2+/ER+	0.194242	0.29	4.62	0.54
HCC1500	HER2-/ER+	0.220754	2.92	1.65	1.04
MDA-MB-453	HER2+/ER-	0.231676	-1.61	3.05	1.32
EFM-192A	HER2+/ER+	0.288068	0.33	4.68	-0.04
T-47D	HER2-/ER+	0.291716	2.34	1.48	0.47
UACC-732	HER2+/ER+	0.311869	1.59	3.71	-0.21
MDA-MB-231	TNBC	0.36861	-2.26	0.79	-0.24
MCF-7	HER2-/ER+	0.377869	2.54	1.23	0.32
SUM-190PT	HER2+/ER-	0.412936	-1.51	5.99	0.83
MDA-MB-361	HER2+/ER+	0.414262	2.15	2.6	1.28
HCC1395	TNBC	0.479577	-2.16	-0.1	-0.2
HCC38	TNBC	0.590144	-2.47	2.42	-0.34
ZR-75-30	HER2+/ER+	0.627914	0.84	4.99	0.72
HCC1143	TNBC	0.698745	-1.15	0.97	-0.26
HCC1569	HER2+/ER-	0.980338	-1.73	4.58	-0.26
BT-20	TNBC	1	-1.61	1.52	-0.27
BT-549	TNBC	1	-2.36	0.91	0.22
CAL-51	TNBC	1	-2.1	1.62	-0.26
COLO-824	TNBC	1	-1.7	1.56	-0.25
DU4475	TNBC	1	-2.17	-0.4	-0.239539
HCC1187	TNBC	1	-1.92	2.37	0.63
HCC1806	TNBC	1	-1.76	0.68	-0.23
HCC1937	TNBC	1	-1.22	1.08	-0.26
HCC1954	HER2+/ER-	1	-2.2	4.53	0.25
HCC70	TNBC	1	-1.96	1.74	-0.12
Hs578T	TNBC	1	-2.18	0.86	0.02
MDA-MB-157	TNBC	1	-2.1	0.63	0.32
		1
MDA-MB-436	TNBC	1	-1.98	0.66	-0.24
MDA-MB-468	TNBC	1	-1.95	-0.53	-0.27
SK-BR-3	HER2+/ER-	1	-1.62	4.81	-0.12
SUM-225CWN	HER2+/ER-	1	-1.62	4.38	0.2
UACC-812	HER2+/ER+	1	0.35	4.37	0.1

## Sheet: Sheet2
CellLineName	Subtype	Ribociclib IC50 (μMol/L)	ER	HER2	AR
HCC2218	HER2+/ER-	0.029807	-1.26	4.96	0.77
MDA-MB-175-VII	HER2-/ER+	0.0317139	0	2.46	0.39
MDA-MB-134-VI	HER2-/ER+	0.0354837	3.06	1.41	0.99
UACC-893	HER2+/ER-	0.074094	-1.11	4.32	0.42
EFM-19	HER2-/ER+	0.0818397	2.5	2.59	0.73
CAMA-1	HER2+/ER-	0.0838482	-0.46	3.4	1.23
ZR-75-1	HER2-/ER+	0.0923023	2.13	1.58	0.52
MDA-MB-415	HER2-/ER+	0.103524	0.2	2.08	0.68
HCC202	HER2+/ER-	0.165239	-1.38	4.69	1.67
HCC1419	HER2+/ER+	0.176269	0.09	4.67	0.47
BT-474	HER2+/ER+	0.194242	0.29	4.62	0.54
HCC1500	HER2-/ER+	0.220754	2.92	1.65	1.04
MDA-MB-453	HER2+/ER-	0.231676	-1.61	3.05	1.32
EFM-192A	HER2+/ER+	0.288068	0.33	4.68	-0.04
T-47D	HER2-/ER+	0.291716	2.34	1.48	0.47
UACC-732	HER2+/ER+	0.311869	1.59	3.71	-0.21
MDA-MB-231	TNBC	0.36861	-2.26	0.79	-0.24
MCF-7	HER2-/ER+	0.377869	2.54	1.23	0.32
SUM-190PT	HER2+/ER-	0.412936	-1.51	5.99	0.83
MDA-MB-361	HER2+/ER+	0.414262	2.15	2.6	1.28
HCC1395	TNBC	0.479577	-2.16	-0.1	-0.2
HCC38	TNBC	0.590144	-2.47	2.42	-0.34
ZR-75-30	HER2+/ER+	0.627914	0.84	4.99	0.72
HCC1143	TNBC	0.698745	-1.15	0.97	-0.26
HCC1569	HER2+/ER-	0.980338	-1.73	4.58	-0.26
BT-20	TNBC	1	-1.61	1.52	-0.27
BT-549	TNBC	1	-2.36	0.91	0.22
CAL-51	TNBC	1	-2.1	1.62	-0.26
COLO-824	TNBC	1	-1.7	1.56	-0.25
DU4475	TNBC	1	-2.17	-0.4	-0.239539
HCC1187	TNBC	1	-1.92	2.37	0.63
HCC1806	TNBC	1	-1.76	0.68	-0.23
HCC1937	TNBC	1	-1.22	1.08	-0.26
HCC1954	HER2+/ER-	1	-2.2	4.53	0.25
HCC70	TNBC	1	-1.96	1.74	-0.12
Hs578T	TNBC	1	-2.18	0.86	0.02
MDA-MB-157	TNBC	1	-2.1	0.63	0.32
MDA-MB-436	TNBC	1	-1.98	0.66	-0.24
MDA-MB-468	TNBC	1	-1.95	-0.53	-0.27
SK-BR-3	HER2+/ER-	1	-1.62	4.81	-0.12
SUM-225CWN	HER2+/ER-	1	-1.62	4.38	0.2
UACC-812	HER2+/ER+	1	0.35	4.37	0.1
ER, HER2 and AR protein levels measured by RPPA
