# Supplementary material for: Targeting activated PI3K/mTOR signaling overcomes acquired resistance to CDK4/6-based therapies in preclinical models of hormone receptor-positive breast cancer
Source: Breast Cancer Res. 2020 Aug 14;22:89. doi: 10.1186/s13058-020-01320-8 (PMC7427086; doi:10.1186/s13058-020-01320-8)
Supplement: Supplementary file 9 — Additional file 9: Table S6–18. Mean tumor volumes and mouse body weights from each of the xenograft studies presented in this manuscript. [file 13058_2020_1320_MOESM9_ESM.xlsx]

## Sheet: Sheet1
Table S6: Mean Tumor Volumes and Mouse Body Weights from EFM19/EFM19PR Xenograft Study (Figure 1C)
Xenograft Model/Group	No. Mice	Mean tumor volume mm3			T/C	Statistical significance vs vehicle	Max % Body Weight Loss	Deaths
		Day 1	Day last	Change = DLast–D1				TR	NTR
EFM19 Vehicle Control	4	456.66	1272.61	815.95	-	-	2.7	0	0
EFM19 Palbociclib 100 mg/kg QD	4	467.865	302.676	-165.189	0.237839	p = 0.0026	0	0	0
EFM19-PR Vehice Control	8	403.848	1102.34	698.495	-	-	0	0	0
EFM19-PR Palbociclib 100 mg/kg QD	8	418.419	901.393	482.974	0.817707	p = 0.2845	0	0	0
Table S7: Mean Tumor Volumes and Mouse Body Weights from EFM19-PR treated with PI3K-inhibitors (Figure 2C)
Xenograft Model/Group	No. Mice	Mean tumor volume mm3			T/C	Statistical significance vs Palbo+Fulv	Max % Body Weight Loss	Deaths
		Day 1	Day last	Change = DLast–D1				TR	NTR
Palbociclib + Fulvestrant	8	460.761	794.577	333.816	-	-	0.4	0	0
Ribociclib + Fulvestrant	8	476.809	1008	531.193	1.2686	p = 0.4188	2.1	0	1
Alpelisib + Fulvestrant	8	466.063	210.941	-255.122	0.265475	p = 0.0586	0	0	1
Everolimus + Fulvestrant	8	497.628	537.643	40.0148	0.67664	p = 0.2345	1.5	0	1
Alpel + Ribo + Fulv	8	466.105	214.461	-251.644	0.269906	p = 0.0728	5.9	0	0
Table S8: Mean Tumor Volumes and Mouse Body Weights from HCC1500-PR treated with PI3K-inhibitors (Figure 2E)
Xenograft Model/Group	No. Mice	Mean tumor volume mm3			T/C	Statistical significance vs Ribo+Fulv	Max % Body Weight Loss	Deaths
		Day 1	Day last	Change = DLast–D1				TR	NTR
Ribociclib + Fulvestrant	6	714.989	2756.2	2041.21	-	-	1.3	0	1
Alpelisib + Fulvestrant	6	766.717	1344.51	577.797	0.487814	p = 0.2278	6.3	0	1
Everolimus + Fulvestrant	6	768.041	261.639	-506.402	0.0949276	p = 0.0246	1.9	0	0
Table S9: Mean Tumor Volumes and Mouse Body Weights from MCF-PR treated with PI3K-inhibitors (Figure 3A, 2nd treatment phase)
Xenograft Model/Group	No. Mice	Mean tumor volume mm3			T/C	Statistical significance vs Palbo+Fulv	Max % Body Weight Loss	Deaths
		Day 1	Day last	Change = DLast–D1				TR	NTR
Continious Palbociclib+Fulvestrant	5	587.401	943.259	355.858	-	-	2.1	0	0
Alpelisib followed by Ribociclib	5	573.791	1454.26	880.467	1.54174	p = 0.1185	3.9	0	0
Alpelisib followed by Fukvestrant	5	513.99	993.371	479.381	1.05313	p = 0.4404	2.7	0	0
Alpelisib followed by Ribociclib+Fulvestrant	5	579.305	1742.3	1162.99	1.8471	p = 0.1434	2.4	0	0
Alpelisib followed by Ribociclib+Fulvestrant+Alpelisib	5	527.305	209.944	-317.361	0.222573	p = 0.0387	3.2	0	0
No treatment followed by Ribociclib+Fulvestrant+Alpelisib	5	558.227	602.507	44.2801	0.63875	p = 0.1121	1.8	0	0
Table S10: Mean Tumor Volumes and Mouse Body Weights from MCF7-PR treated with PI3K-inhibitors (Figure 3C)
Xenograft Model/Group	No. Mice	Mean tumor volume mm3			T/C	Statistical significance vs Palbo+Fulv	Max % Body Weight Loss	Deaths
		Day 1	Day last	Change = DLast–D1				TR	NTR
Palbocliclib + Fulvestrant (Control)	7	244.454	1009.15	764.693	-	-	2.2	0	1
75mg/kg Ribociclib	7	247.756	1621.38	1373.63	1.60669	p = 0.2566	2.6	0	2
35mg/kg Alpelisib	7	249.187	241.603	-7.58449	0.239413	p = 0.0131	6.4	0	2
10mg/kg Everolimus	7	245.25	202.21	-43.0406	0.836952	p = 0.0081	8.5	0	3
Table S11: Mean Tumor Volumes and Mouse Body Weights from HCC1500-PR treated with PI3K-inhibitors (Figure 3D, 2nd treatment phase)
Xenograft Model/Group	No. Mice	Mean tumor volume mm3			T/C	Statistical significance vs Palbo+Fulv	Max % Body Weight Loss	Deaths
		Day 1	Day last	Change = DLast–D1				TR	NTR
Continious Palbociclib + Fulvestrant	8	435.906	1332.02	896.11	-	-	0	0	1
Alpelisib followed by Ribociclib	6	439.586	1986.95	1547.37	1.49169	p = 0.0693	5	0
Alpelisib followed by Fulvestrant	6	412.514	1412.28	999.766	1.06026	p = 0.2096	2	0	1
Alpelisib followed by Ribociclib + Fulvestrant	6	407.426	1200.64	793.21	0.901367	p = 0.3624	0	0	2
Alpelisib followed by Ribociclib + Fulvestrant + Alpelisib	6	423.387	305.365	-118.021	0.229251	p = 0.0006	3.9	0	0
No treatment followed by Ribociclib + Fulvestrant + Alpelisib	6	434.662	487.642	52.9801	0.366093	p = 0.0036	0	0	1
No treatment followed by Ribociclib	6	458.973	1429.77	970.795	1.07339	p = 0.0714	2.2	0	2
Table S12: Mean Tumor Volumes and Mouse Body Weights from HCC1500-PR treated with PI3K-inhibitors (Figure 3E)
Xenograft Model/Group	No. Mice	Mean tumor volume mm3			T/C	Statistical significance vs Palbo+Fulv	Max % Body Weight Loss	Deaths
		Day 1	Day last	Change = DLast–D1				TR	NTR
Palbocliclib + Fulvestrant (Control)	7	293.838	1042.97	749.136	-	-	2	0	1
75mg/kg Ribociclib	7	260.365	1844.01	1583.64	1.76803	p = 0.0661	1.7	1	2
35mg/kg Alpelisib	7	283.042	408.647	125.606	0.391809	p = 0.0150	13.2	1	2
10mg/kg Everolimus	7	239.332	221.966	-17.3663	0.543171	p = 0.0180	9.1	0	2
Table S13: Mean Tumor Volumes and Mouse Body Weights from MCF7 treated with PI3K-inhibitors plus fulvestrant (Figure 4A)
Xenograft Model/Group	No. Mice	Mean tumor volume mm3			T/C	Statistical significance vs Palbo+Fulv	Max % Body Weight Loss	Deaths
		Day 1	Day last	Change = DLast–D1				TR	NTR
Vehicle	6	169.167	543.533	374.367	-	-	1.5	0	0
Fulvestrant	6	168.883	141.85	-27.0333	0.260978	p = 0.0006	1.3	0	0
Alpelisib	6	165.817	269.283	103.467	0.495431	p = 0.0005	1.1	0	0
Alpelisib + Fulvestrant	6	167.429	173.933	6.50476	0.645912	p = 0.0001	4.7	0	1
Table S14: Mean Tumor Volumes and Mouse Body Weights from ZR751 treated with PI3K-inhibitors plus fulvestrant (Figure 4B)
Xenograft Model/Group	No. Mice	Mean tumor volume mm3			T/C	Statistical significance vs Palbo+Fulv	Max % Body Weight Loss	Deaths
		Day 1	Day last	Change = DLast–D1				TR	NTR
Vehicle	10	165.24	430.67	265.43	-	-	4.1	0	0
Fulvestrant	10	161.92	165.72	3.8	0.384796	p = 0.0001	1.6	0	0
Alpelisib	10	162.35	254.711	92.3611	0.59143	p = 0.0013	9.9	0	0
Alpelisib + Fulvestrant	10	162.88	126.47	-36.41	0.496523	p = 0.0001	11.4	0	0
Table S15: Mean Tumor Volumes and Mouse Body Weights from ZR751 xenografts progressing on Buparlisib/Fuvlestrant, swiitched to Buparlisib/Fuvlestrant plus ribociclib (Figure 4D)
Xenograft Model/Group	No. Mice	Mean tumor volume mm3			T/C	Statistical significance vs Palbo+Fulv	Max % Body Weight Loss	Deaths
		Day 1	Day last	Change = DLast–D1				TR	NTR
Buparlisib + Fulvestrant	8	165.24	653.833	488.593	-	-	6	1	1
Buparlisib + Fulvestrant + Ribociclib	8	162.88	335.86	172.98	0.513678	p = 0.0695	11	2	1
Table S16: Mean Tumor Volumes and Mouse Body Weights from ZR751 treated with PI3K-inhibitors (Figure 5A)
Xenograft Model/Group	No. Mice	Mean tumor volume mm3			T/C	Statistical significance vs Palbo+Fulv	Max % Body Weight Loss	Deaths
		Day 1	Day last	Change = DLast–D1				TR	NTR
Vehicle	8	150.863	563.487	412.625	-	-	0	0	0
Ribociclib	8	156.562	262.113	105.55	0.465161	p < 0.0001	0.9	0	0
Ribociclib + Fulvestrant	8	154.875	108.25	-46.625	0.192107	p < 0.0001	0	0	0
Ribociclib + Aleplisib + Fulvestrant	8	152.438	35.475	-116.963	0.0629561	p < 0.0001	5.2	0	0
Ribociclib + Everolimus + Fulvestrant	8	156.662	35.25	-121.412	0.0625568	p < 0.0001	13	0	0
Table S17: Mean Tumor Volumes and Mouse Body Weights from MCF7 treated with PI3K-inhibitors (Figure 5A)
Xenograft Model/Group	No. Mice	Mean tumor volume mm3			T/C	Statistical significance vs Palbo+Fulv	Max % Body Weight Loss	Deaths
		Day 1	Day last	Change = DLast–D1				TR	NTR
Vehicle	8	327.637	1412.17	1084.54	-	-	2.6	0	0
Ribociclib	8	325.113	466.325	141.212	0.330218	p < 0.0001	3.6	0	1
Ribociclib + Fulvestrant	8	333.262	278.062	-55.2	0.196904	p < 0.0001	6.4	0	0
Ribociclib + Aleplisib + Fulvestrant	8	321.05	115.162	-205.888	0.0815497	p < 0.0001	11.9	0	0
Ribociclib + Everolimus + Fulvestrant	8	327.837	199.262	-128.575	0.141103	p < 0.0001	8.4	0	0
Table S18 Mean Tumor Volumes and Mouse Body Weights from HBX-34 PDX treated with PI3K-inhibitors (Figure 5C)
Xenograft Model/Group	No. Mice	Mean tumor volume mm3			T/C	Statistical significance vs Palbo+Fulv	Max % Body Weight Loss	Deaths
		Day 1	Day last	Change = DLast–D1				TR	NTR
Vehicle	10	191.95	734.55	542.6	-	-	0.1	0	2
Letrozole	10	197.25	417.1	219.85	0.567831	p < 0.0001	0	0	0
Ribociclib	10	196.5	514.2	317.7	0.70002	p < 0.0001	0.6	0	0
Aleplisib	10	183.15	328.85	145.7	0.447689	p < 0.0001	1.8	0	0
Ribociclib + Letrozole	10	193.75	205.05	11.3	0.279151	p < 0.0001	1	1	0
Aleplisib + Letrozole	10	194.5	172.95	-21.55	0.336348	p < 0.0001	2.7	0	0
Ribociclib + Letrozole + Alpelisib	10	197.25	108.444	-88.8056	0.210899	p < 0.0001	6.8	1	0
